# Supplementary material for: T-helper 1-type cytokines induce apoptosis and loss of HER-family oncodriver expression in murine and human breast cancer cells
Source: PubMed Central journal article supplement (PMC6800266; doi:10.18632/oncotarget.10298), 2019-10-15
Supplement: oncotarget-10-6006-s001.pdf [file oncotarget-10-6006-s001.pdf]

## T-helper 1-type cytokines induce apoptosis and loss of HER-family oncodriver expression in murine and human breast cancer cells

### SUPPLEMENTARY MATERIALS

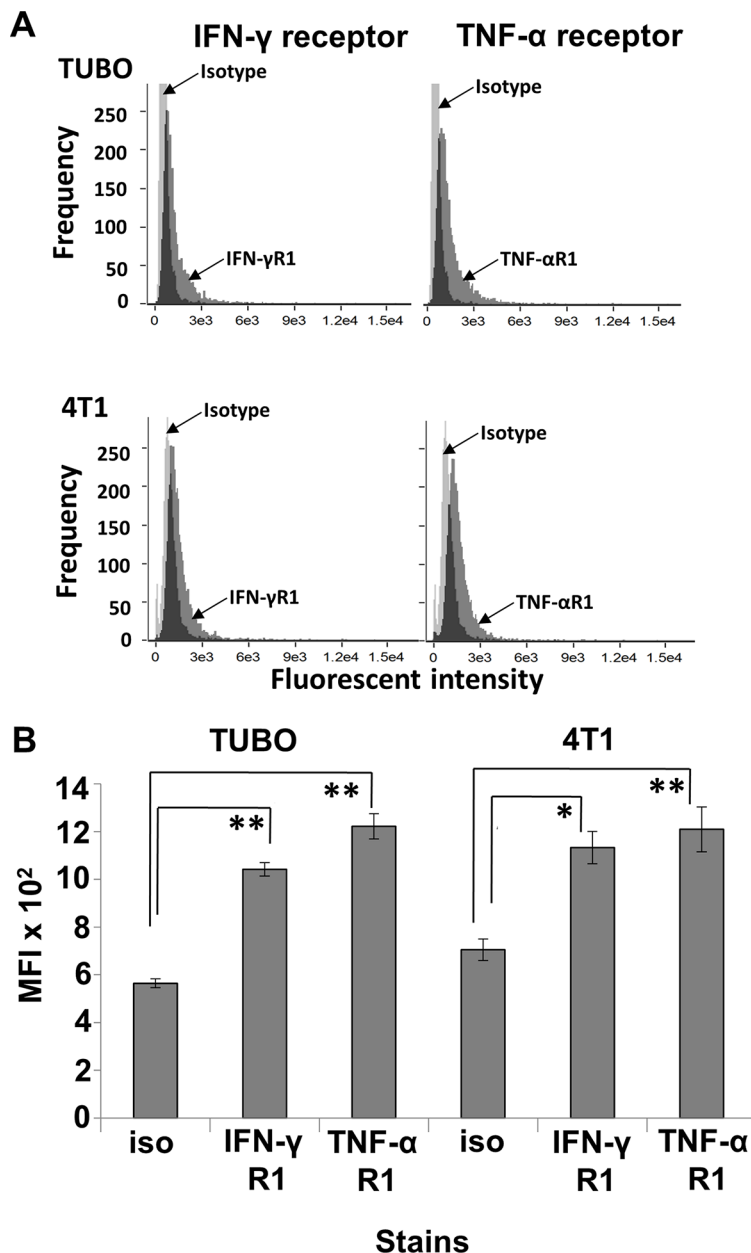

**Supplementary Figure 1: Cytokine-sensitive and insensitive cell lines express comparable levels of Th1 cytokine receptors.** Untreated TUBO and 4T1 cells were harvested and stained with PE Anti-mouse CD120a (TNF- $\alpha$  R1), PE Anti-mouse CD119 (IFN- $\gamma$ R1) or PE -labeled control IgG and analyzed by flow cytometry. (A) Representative histograms of stained TUBO and 4T1 cells. (B) Summary analysis of fluorescent values denoted by mean fluorescent intensity (MFI) of PE channel ( $p < .05$ ;  $**p < .01$ ). Composite results from 3 independent experiments. +/–SEM.

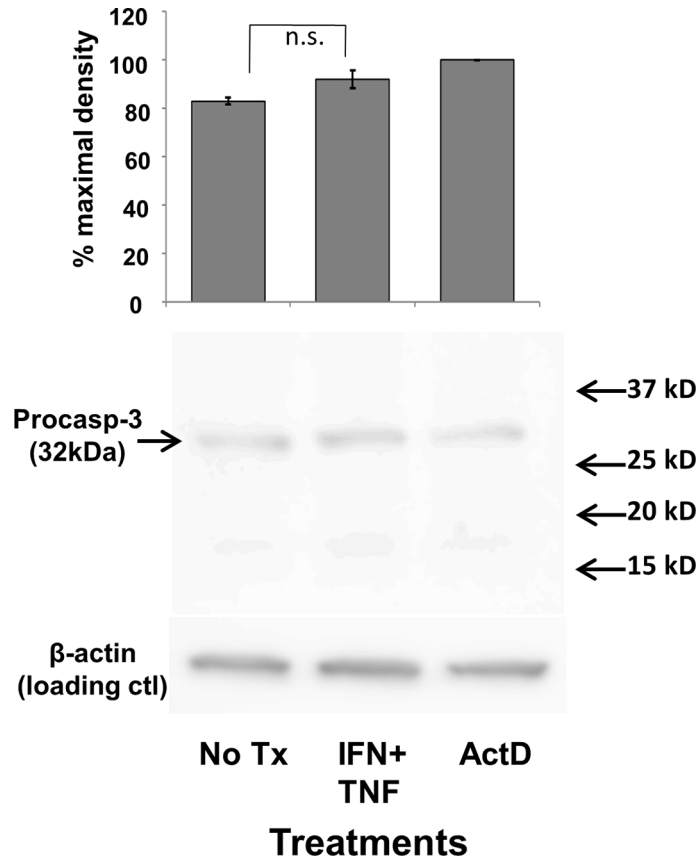

**Supplementary Figure 2: Th1 cytokines fail to induce activation of caspase-3 in cytokine-insensitive 4T1 cells.** Murine 4T1 cells were cultured alone, in the presence of TNF- $\alpha$  plus IFN- $\gamma$ , or with actinomycin D for 5 hours, harvested, and subjected to Western blot analysis using anti-procaspase 3 antibodies. Upper panel represents combined data from 3 separate experiments with caspase staining intensity values normalized against  $\beta$ -actin  $\pm$  SEM. Lower panel features a representative blot from one of these experiments.

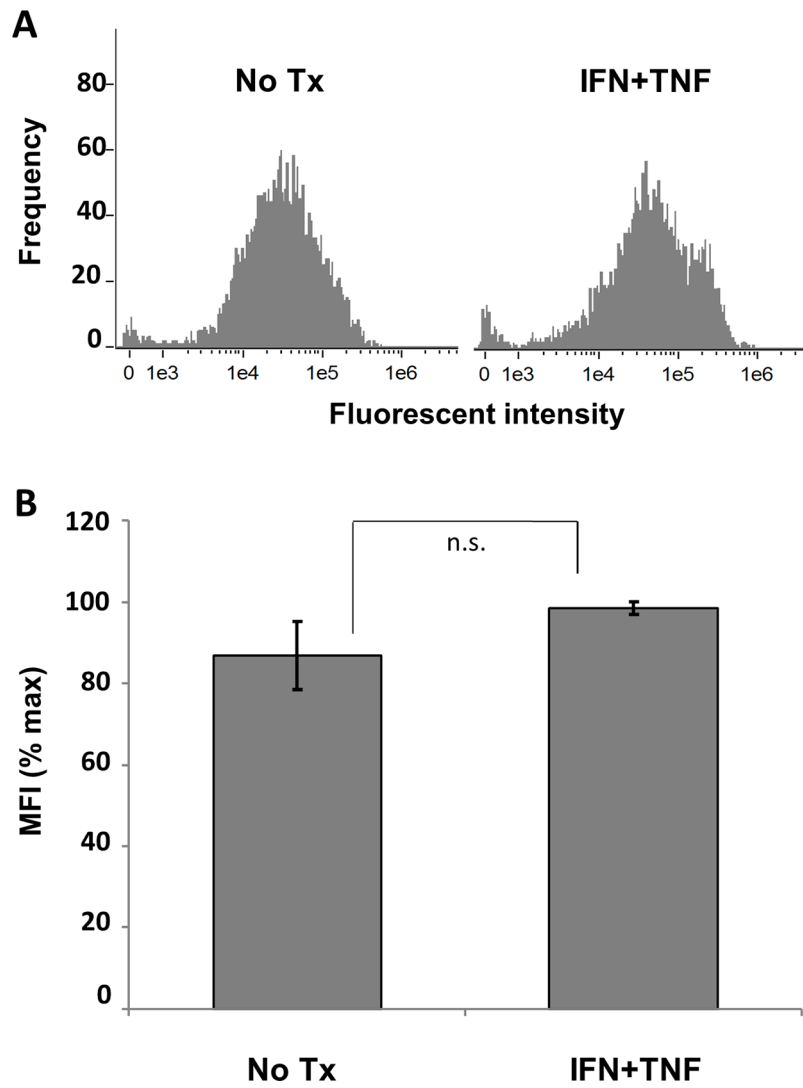

**Supplementary Figure 3: Surface expression of EpCAM is unaffected by Th1 cytokines.** TUBO cells were cultured alone or in the presence of TNF- $\alpha$  and IFN- $\gamma$  for 72 hours, harvested and analyzed for EpCAM expression via flow cytometry. (A) Representative histograms of untreated and treated TUBO cells. (B) Composite data of 3 separate trials. Values represent percent maximal mean fluorescence intensity  $\pm$  SEM from 3 separate experiments.
